# Supplementary figures and images for: Biochanin A Mitigates Atherosclerosis by Inhibiting Lipid Accumulation and Inflammatory Response
Source: Hindawi journal article supplement (doi:10.1155/2020/8965047), 2020-11-10

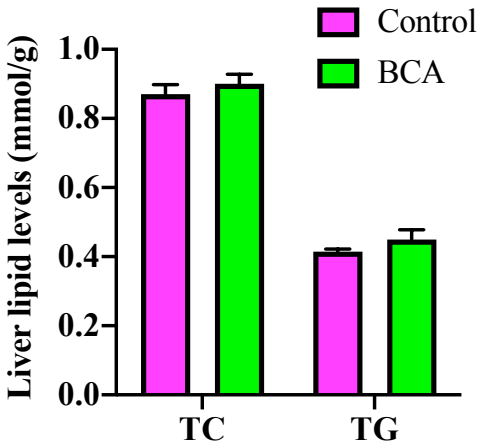

**Supplementary Figure 1**

Supplement: f1 [file 8965047.f1.zip]

**a**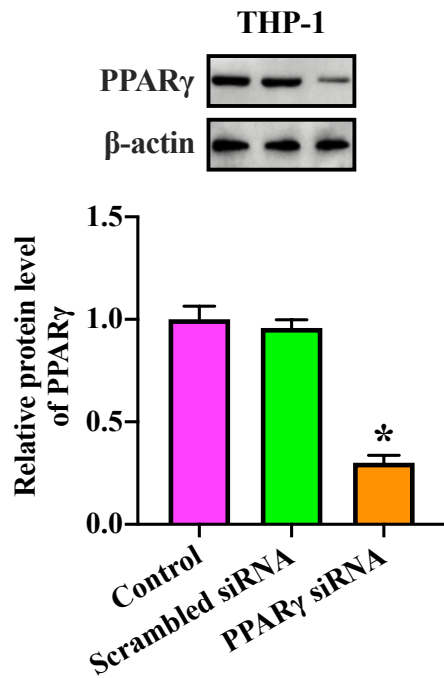**b**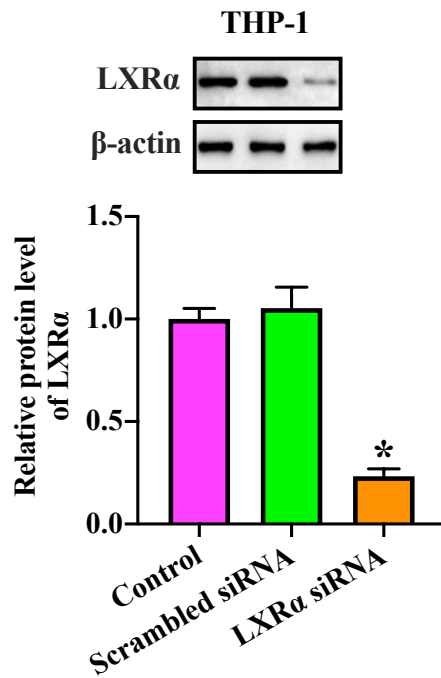**c**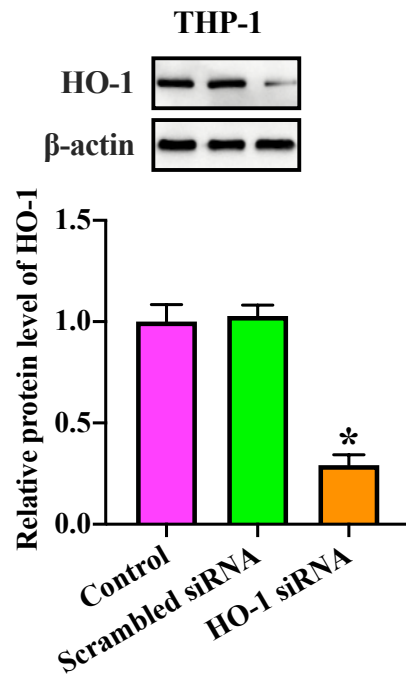**Supplementary Figure 2**

Supplement: f1 [file 8965047.f1.zip]
